# Supplementary material for: Nonadiabatic dynamics simulations of singlet fission in 2,5-bis(fluorene-9-ylidene)-2,5-dihydrothiophene crystals
Source: Royal Society of Chemistry journal article supplement (doi:10.1039/c8cp05474f), 2018-12-13

**Nonadiabatic dynamics simulations of singlet fission in  
2,5-bis(fluorene-9-ylidene)-2,5-dihydrothiophene  
crystals.**

**Supporting Information.**

**Meilani Wibowo<sup>a,b</sup>, Maurizio Persico<sup>a,\*</sup>, Giovanni Granucci<sup>a</sup>**

<sup>a</sup> Dipartimento di Chimica e Chimica Industriale, Università di Pisa,  
v. G. Moruzzi, I-56124 Pisa, Italy

<sup>b</sup> Theoretical Chemistry, Zernike Institute for Advanced Materials, University  
of Groningen, Nijenborgh 4, 9747 AG Groningen, The Netherlands

## Molecular orbitals and transition dipole moment.

Fig. S1 shows the HOMO and LUMO orbitals of ThBF, as computed at FOMO-CI level. At the equilibrium geometry the point group is  $C_s$ , with a symmetry plane that divides the molecule in half and contains the sulphur atom. The HOMO is  $a'$  and the LUMO is  $a''$ , so the  $S_0 \rightarrow S_1$  transition dipole is perpendicular to the symmetry plane. By forcing the molecule in a planar  $C_{2v}$  conformation, which is approximately the situation in the crystal, the transition dipole lies in the molecular plane.

Figure S1: HOMO and LUMO orbitals of ThBF.

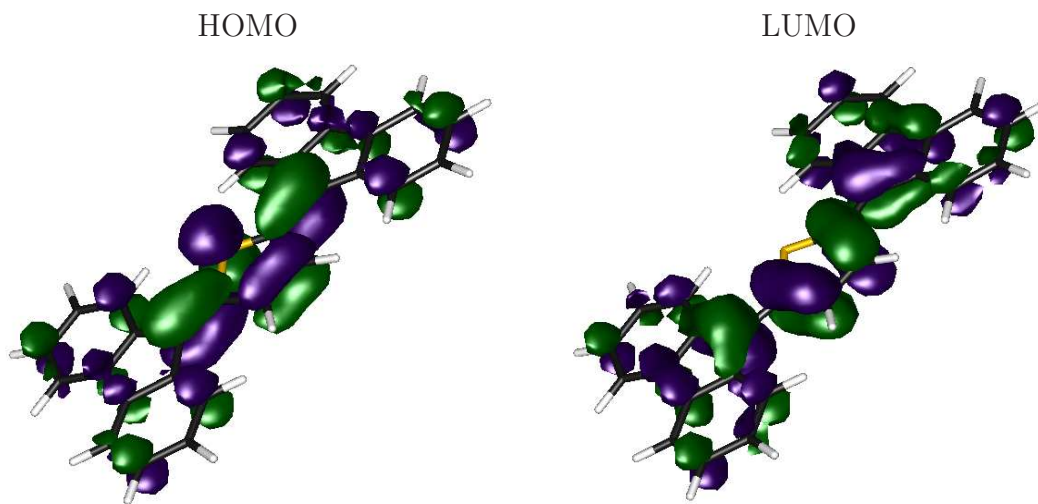

### QM/MM thermal equilibration.

Figs. S2 and S3 allow to monitor different aspects of the progress of the thermal equilibration of the QM/MM cluster.

Figure S2: Total energy (a.u.) as a function of time for the QM/MM cluster.

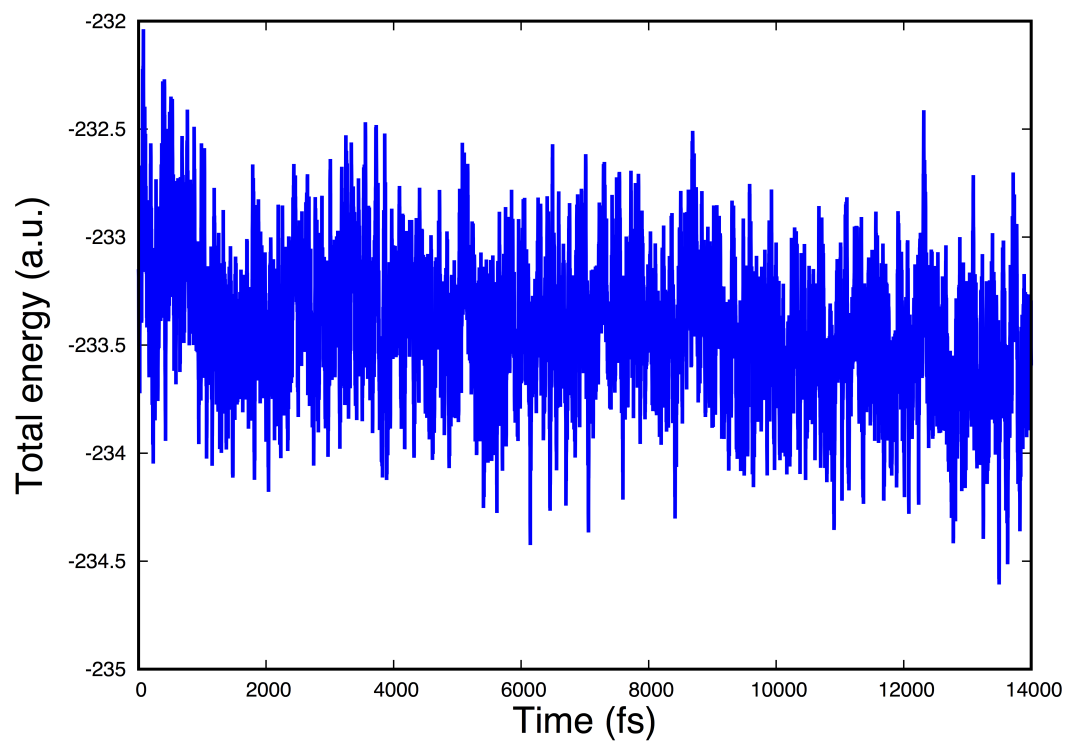

Figure S3: Absorption spectra as obtained by averaging over different time intervals during the thermal equilibration of the QM/MM cluster.

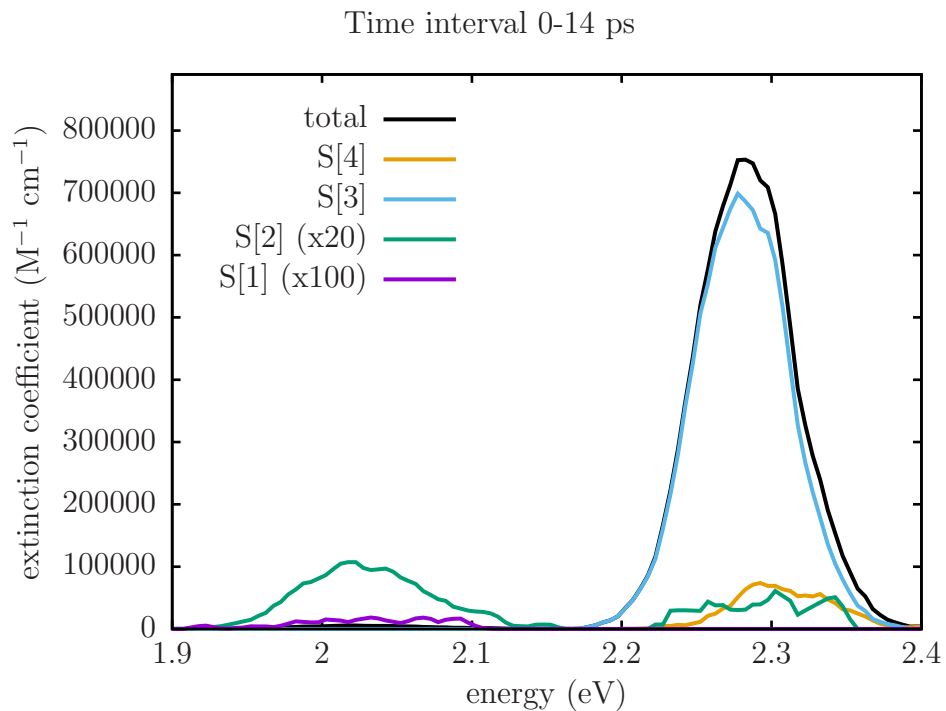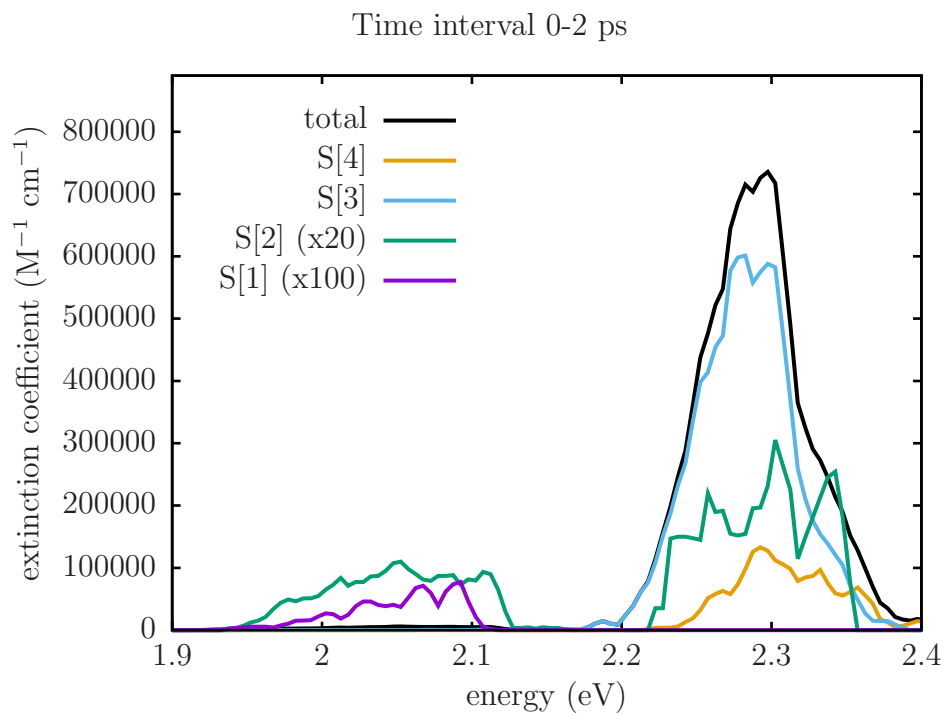

Time interval 2-5 ps

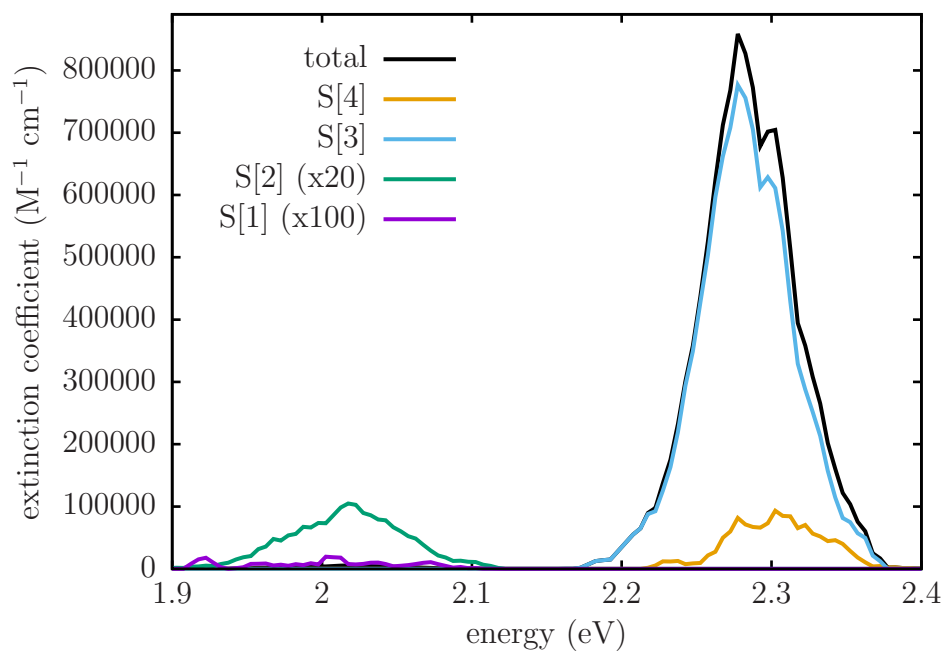

Time interval 5-8 ps

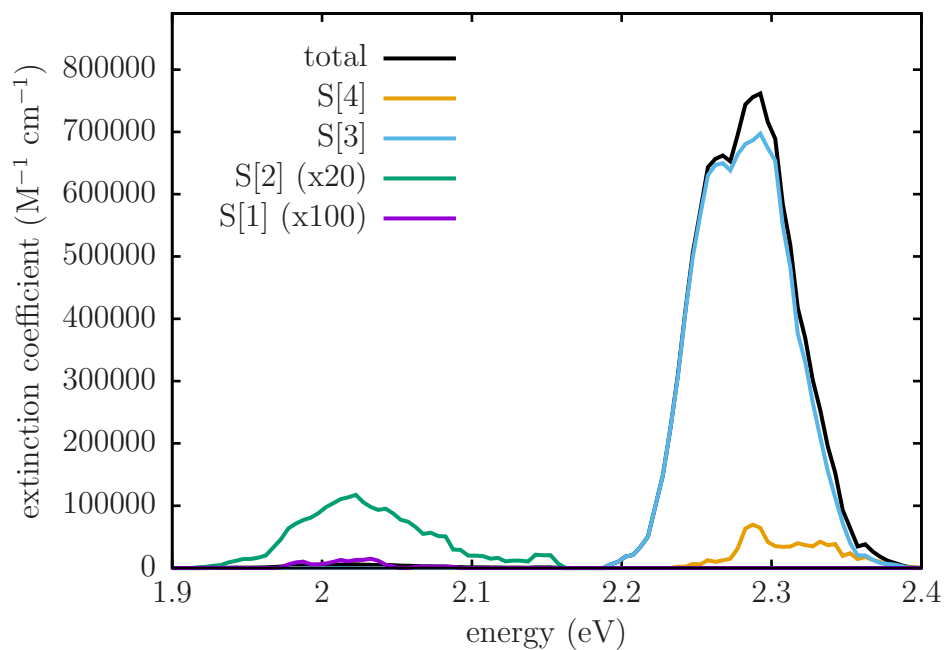

Time interval 8-11 ps

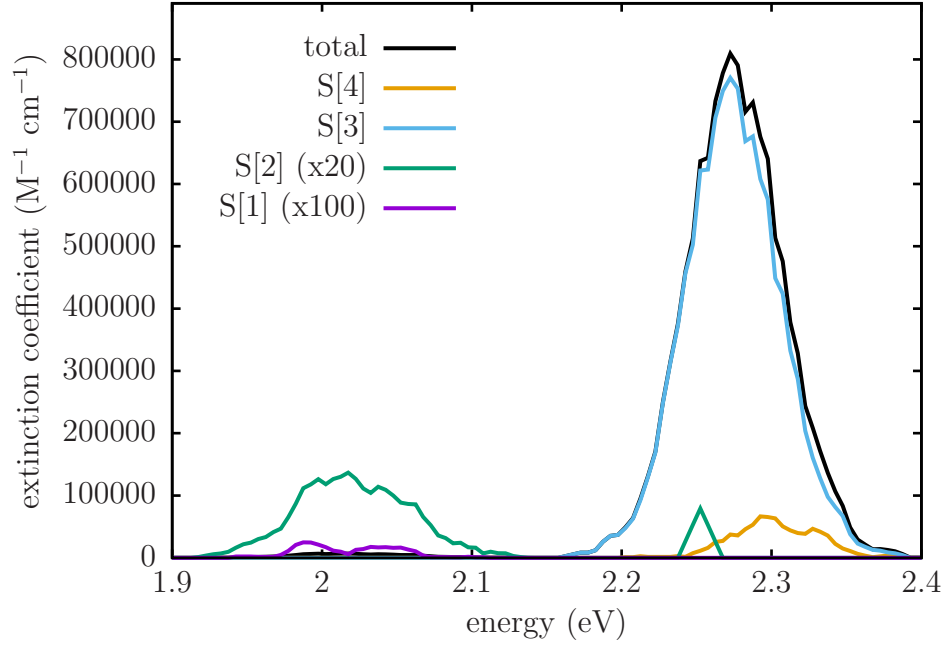

Time interval 11-14 ps

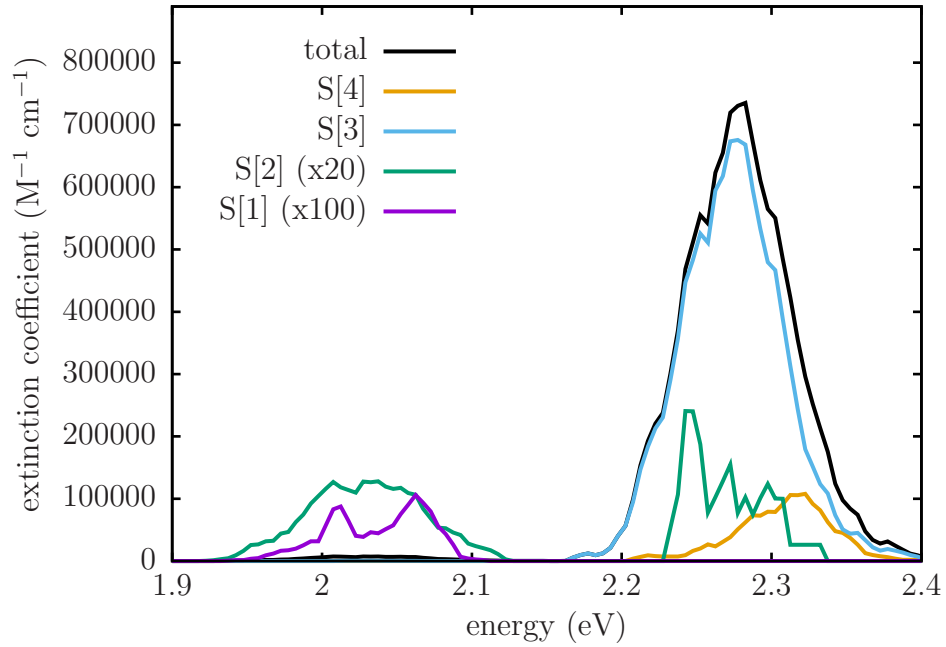

**Excited state dynamics.** Fig. S4 shows the time dependence of the adiabatic state populations with an expanded time scale, for the first 500 fs. Fig. S5 compares the population of the S[1] state with that of the  $^1\text{TT}$  state, computed as the fraction of trajectories where the current state can be identified as  $^1\text{TT}$ .

Table S1 is a more detailed version of table 3 in the main text, reporting the transition rates between all pairs of states instead of grouping together the states from S[4] to S[8].

Figure S4: The adiabatic state populations in the first 500 fs.

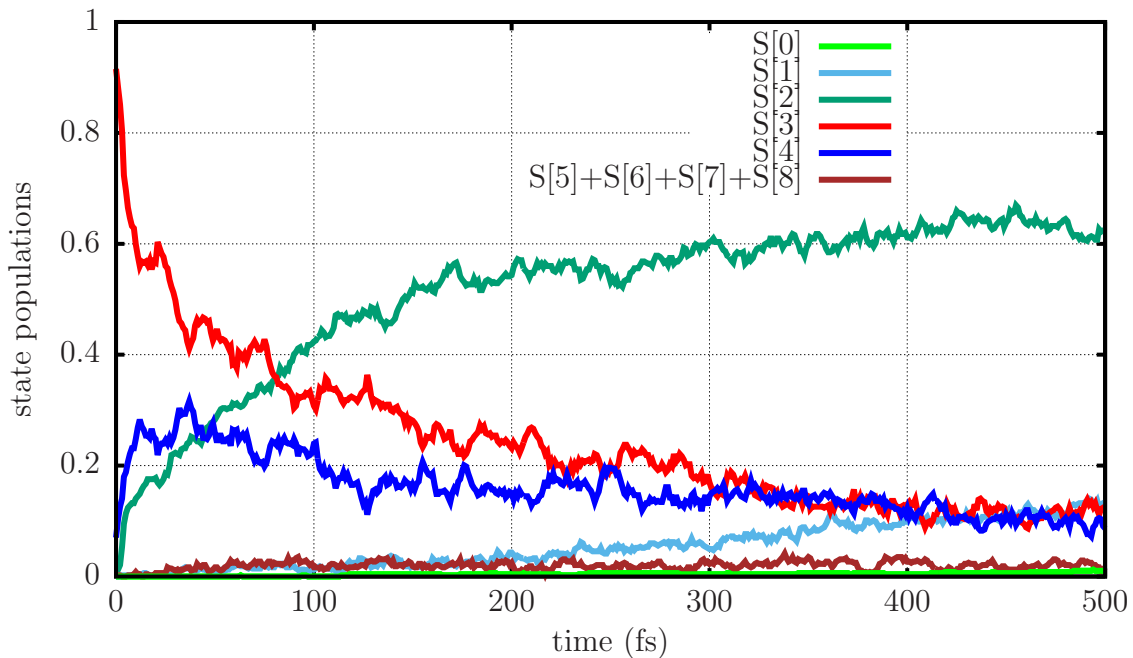

Figure S5: Population of the  ${}^1\text{TT}$  state compared with that of the adiabatic state  $\text{S}[1]$ .

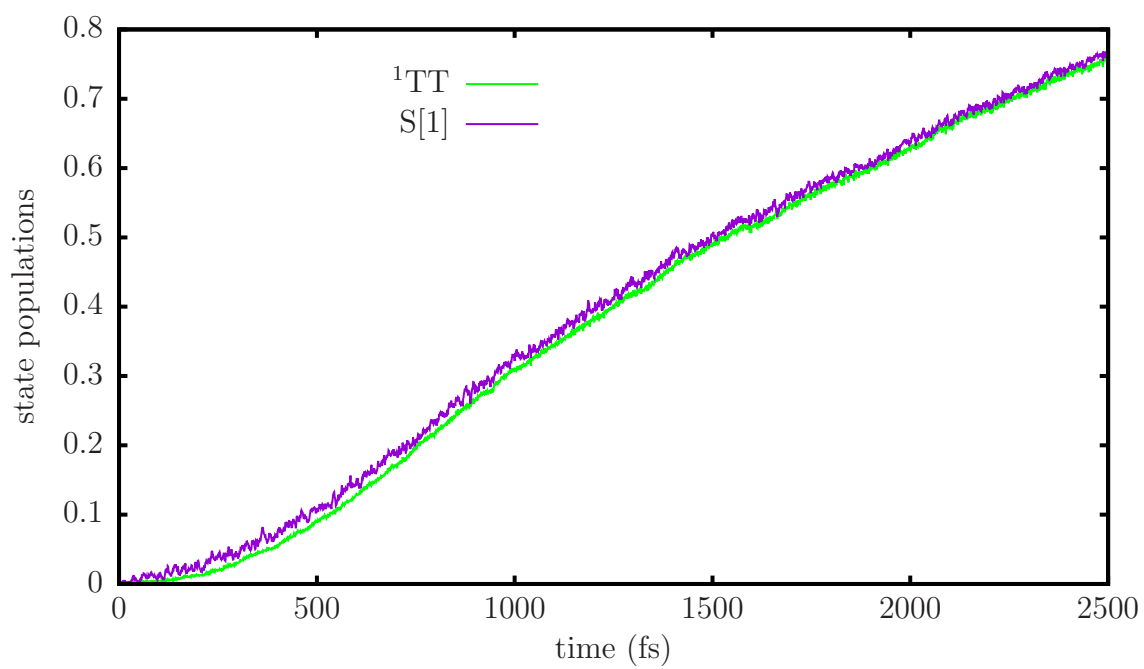



Table S1: Hopping rates ( $\text{ps}^{-1}$ ).

| state    | state    | rate <sup>a</sup>   | rate <sup>a</sup>   | net               |
|----------|----------|---------------------|---------------------|-------------------|
| <i>m</i> | <i>n</i> | <i>m</i> → <i>n</i> | <i>n</i> → <i>m</i> | rate <sup>b</sup> |
| S[1]     | S[0]     | 0.000               | 0.001               | -0.001            |
| S[2]     | S[0]     | 0.042               | 0.018               | 0.024             |
| S[3]     | S[0]     | 0.007               | 0.007               | 0.000             |
| S[4]     | S[0]     | 0.002               | 0.009               | -0.007            |
| S[5]     | S[0]     | 0.000               | 0.002               | -0.002            |
| S[6]     | S[0]     | 0.005               | 0.002               | 0.002             |
| S[7]     | S[0]     | 0.002               | 0.002               | 0.000             |
| S[8]     | S[0]     | 0.001               | 0.002               | -0.001            |
| S[2]     | S[1]     | 3.540               | 3.192               | 0.349             |
| S[3]     | S[1]     | 0.016               | 0.031               | -0.015            |
| S[4]     | S[1]     | 0.002               | 0.012               | -0.011            |
| S[5]     | S[1]     | 0.001               | 0.009               | -0.008            |
| S[6]     | S[1]     | 0.000               | 0.006               | -0.006            |
| S[7]     | S[1]     | 0.000               | 0.002               | -0.002            |
| S[8]     | S[1]     | 0.000               | 0.002               | -0.002            |
| S[3]     | S[2]     | 3.326               | 2.165               | 1.160             |
| S[4]     | S[2]     | 0.796               | 1.208               | -0.412            |
| S[5]     | S[2]     | 0.105               | 0.340               | -0.236            |
| S[6]     | S[2]     | 0.074               | 0.123               | -0.050            |
| S[7]     | S[2]     | 0.042               | 0.055               | -0.013            |
| S[8]     | S[2]     | 0.013               | 0.031               | -0.018            |
| S[4]     | S[3]     | 5.127               | 4.357               | 0.770             |
| S[5]     | S[3]     | 0.086               | 0.062               | 0.024             |
| S[6]     | S[3]     | 0.050               | 0.048               | 0.002             |
| S[7]     | S[3]     | 0.026               | 0.039               | -0.013            |
| S[8]     | S[3]     | 0.014               | 0.014               | 0.000             |
| S[5]     | S[4]     | 1.545               | 1.242               | 0.302             |
| S[6]     | S[4]     | 0.083               | 0.047               | 0.036             |
| S[7]     | S[4]     | 0.025               | 0.033               | -0.008            |
| S[8]     | S[4]     | 0.011               | 0.018               | -0.007            |
| S[6]     | S[5]     | 0.135               | 0.067               | 0.068             |
| S[7]     | S[5]     | 0.019               | 0.007               | 0.012             |
| S[8]     | S[5]     | 0.002               | 0.002               | -0.001            |
| S[7]     | S[6]     | 0.119               | 0.070               | 0.049             |
| S[8]     | S[6]     | 0.012               | 0.007               | 0.004             |
| S[8]     | S[7]     | 0.068               | 0.043               | 0.025             |

<sup>a</sup> Average rate over the whole simulation in  $\text{ps}^{-1} = \frac{\# \text{ hops}}{\# \text{ trajectories} \cdot \text{time}}$

<sup>b</sup> Net rate = difference between the  $m \rightarrow n$  and the  $n \rightarrow m$  rates.

Table S2: Electronic hamiltonian matrix in the basis of 6 low-lying diabatic states for a ThBF dimer, computed with the semiempirical FOMO-CI method. The dimer is made of two ThBF planar molecules at the ground state optimal geometry, with a distance between the two molecular planes of 3.6 Å and a slip of 3.5 Å. Matrix elements in meV.

|                | $S_0(A)S_0(B)$ | ${}^1TT$ | $S_1(A)S_0(B)$ | $S_0(A)S_1(B)$ | $A^-B^+$ | $A^+B^-$ |
|----------------|----------------|----------|----------------|----------------|----------|----------|
| $S_0(A)S_0(B)$ | 0.00           | 0.22     | 30.46          | -30.46         | 39.88    | -39.88   |
| ${}^1TT$       | 0.22           | 1780.29  | 0.02           | -0.02          | -29.41   | 29.41    |
| $S_1(A)S_0(B)$ | 30.46          | 0.02     | 2148.98        | 155.06         | -18.17   | -2.40    |
| $S_0(A)S_1(B)$ | -30.46         | -0.02    | 155.06         | 2148.98        | -2.04    | -18.17   |
| $A^-B^+$       | 39.88          | -29.41   | -18.17         | -2.04          | 2424.00  | 0.01     |
| $A^+B^-$       | -39.88         | 29.41    | -2.04          | -18.17         | 0.01     | 2424.00  |

Table S3: Comparison of state energies and geometrical parameters at the starting time ( $t = 0$ ) and at the S[2]→S[1] hopping events, averaged over all trajectories.

| energy <sup>a</sup> or<br>coordinate <sup>b</sup> | at $t = 0$<br>( $X_0$ ) | at S[2]→S[1] hops<br>( $X_h$ ) | difference<br>$X_h - X_0$ |
|---------------------------------------------------|-------------------------|--------------------------------|---------------------------|
| $\Delta E$ S[1]-S[0]                              | 1.5828                  | 1.3064                         | -0.2764                   |
| $\Delta E$ S[2]-S[0]                              | 1.9589                  | 1.3335                         | -0.6254                   |
| $\Delta E$ S[2]-S[1]                              | 0.3761                  | 0.0271                         | -0.3490                   |
| $\Delta E$ S[3]-S[0]                              | 2.2417                  | 1.8691                         | -0.3726                   |
| $\Delta E$ S[3]-S[2]                              | 0.2828                  | 0.5355                         | 0.2527                    |
| $\angle C_{13}C_{12}C_{14}C_{15}$                 | 8.8430                  | 9.5528                         | 0.7098                    |
| C <sub>12</sub> -C <sub>14</sub>                  | 1.3818                  | 1.3841                         | 0.0023                    |
| C <sub>14</sub> -C <sub>15</sub>                  | 1.4862                  | 1.4838                         | -0.0025                   |
| C <sub>15</sub> -C <sub>16</sub>                  | 1.3667                  | 1.3723                         | 0.0056                    |
| S                                                 | 5.6920                  | 5.5042                         | -0.1879                   |
| C <sub>14</sub>                                   | 5.5513                  | 5.3294                         | -0.2219                   |
| C <sub>15</sub>                                   | 5.4607                  | 5.2585                         | -0.2022                   |
| C <sub>16</sub>                                   | 5.4447                  | 5.3397                         | -0.1050                   |
| C <sub>17</sub>                                   | 5.5534                  | 5.4806                         | -0.0728                   |
| C <sub>12</sub>                                   | 5.5116                  | 5.2020                         | -0.3096                   |
| C <sub>7</sub>                                    | 5.4823                  | 5.3020                         | -0.1804                   |
| C <sub>4</sub>                                    | 5.4898                  | 5.3766                         | -0.1131                   |
| C <sub>9</sub>                                    | 5.4867                  | 5.1739                         | -0.3128                   |
| C <sub>2</sub>                                    | 5.4555                  | 5.2956                         | -0.1598                   |
| C <sub>18</sub>                                   | 5.5319                  | 5.4807                         | -0.0512                   |
| C <sub>23</sub>                                   | 5.5988                  | 5.5113                         | -0.0875                   |
| C <sub>26</sub>                                   | 5.4364                  | 5.4487                         | 0.0124                    |
| C <sub>21</sub>                                   | 5.6505                  | 5.5678                         | -0.0826                   |
| C <sub>28</sub>                                   | 5.3366                  | 5.3813                         | 0.0447                    |

<sup>a</sup> Energy differences in eV between the specified electronic states.

<sup>b</sup> Dihedral angle in degrees and distances in Å. For bond lengths within one monomer, two atoms are specified. For distances between an atom of monomer A and the corresponding atom of monomer B, only the former is specified. For atom labelling, refer to Fig. 1.

**Simulations taking into account the spin-orbit coupling.** The simulation of the excited state dynamics taking into account the spin-orbit coupling (the ‘‘SOC simulation’’) was run by using a more limited sampling of initial conditions, resulting in 66 trajectories, with respect to the singlet-only one described in the main test, which featured a swarm of 484 trajectories. Moreover, it included five singlet states (S[0] to S[4]), whereas the singlet-only simulation had nine (up to S[8]). Figs. 6 and 7 in the main text report the state populations obtained in the singlet-only and SOC simulations, respectively.

Figs. S6 and S7 allow to compare those results with those of two singlet-only simulations using a sampling similar to that of the SOC one: one with five singlet states (Fig. S6) and the other with nine (Fig. S7)

Figure S6: State populations obtained in a singlet-only simulation with five singlet states and a sampling similar to that of the SOC simulation.

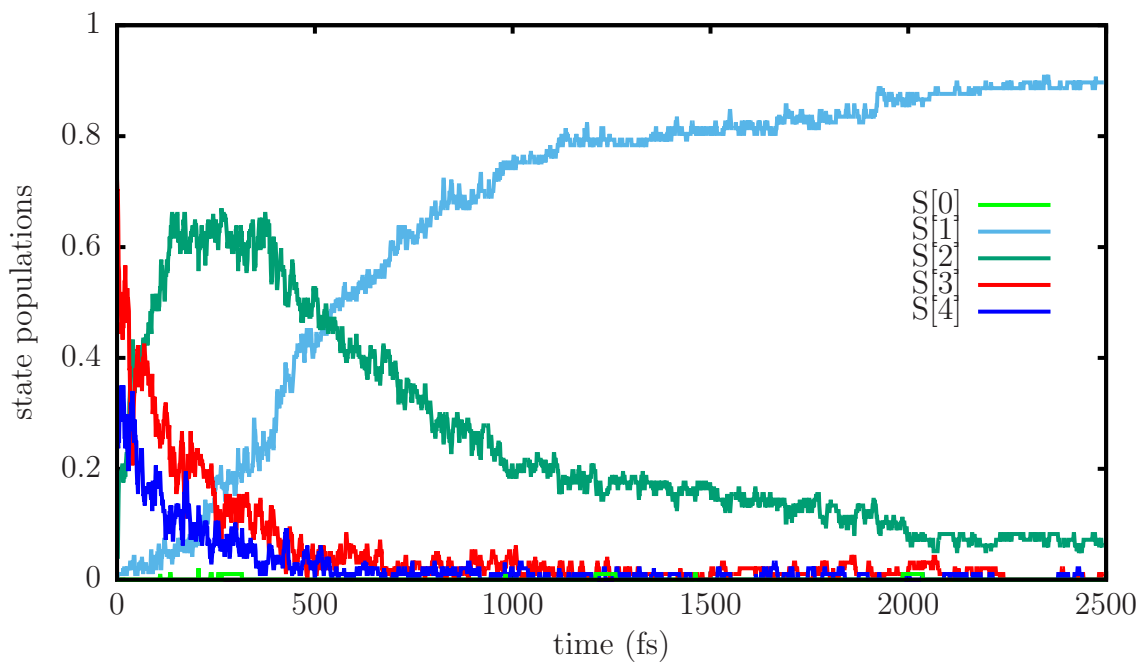

Figure S7: State populations obtained in a singlet-only simulation with nine singlet states and a sampling similar to that of the SOC simulation.

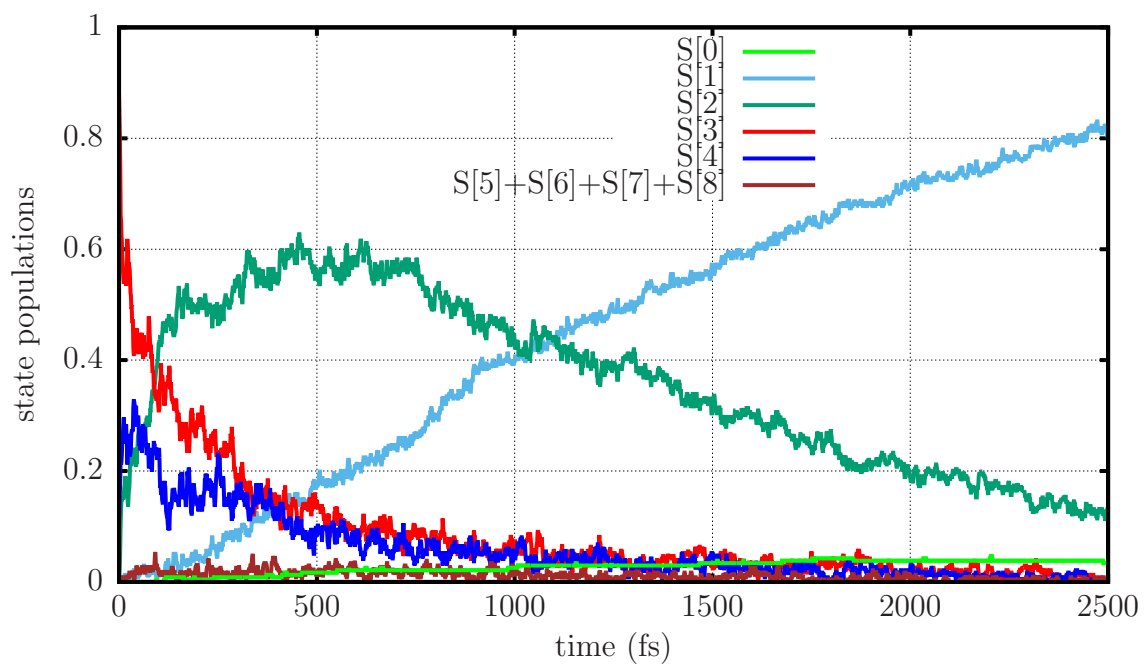

Supplement: c8cp05474f1.pdf [file c8cp05474f1.pdf]
